# Supplementary material for: Construction of a flexible electrochemiluminescence platform for sweat detection
Source: Royal Society of Chemistry journal article supplement (doi:10.1039/c9sc01937e), 2019-01-01
Supplement: c9sc01937e1.pdf [file c9sc01937e1.pdf]

## Supporting Information

# Construction of Flexible Electrochemiluminescence Platform for Sweat Detection

*Miao-Miao Chen,<sup>a</sup> Shi-Bo Cheng,<sup>a</sup> Kailun Ji,<sup>b</sup> Jingwen Gao,<sup>b</sup> Yan-Ling Liu,<sup>a</sup>*

*Wei Wen,<sup>b</sup> Xiuhua Zhang,<sup>\*,b</sup> Shengfu Wang,<sup>b</sup> and Wei-Hua Huang,<sup>\*,a</sup>*

<sup>a</sup> Laboratory of Analytical Chemistry for Biology and Medicine (Ministry of Education), College of Chemistry and Molecular Sciences, Wuhan University, Wuhan 430072, China

<sup>b</sup> Hubei Collaborative Innovation Center for Advanced Organic Chemical Materials, Ministry of Education Key Laboratory for the Synthesis and Application of Organic Functional Molecules & College of Chemistry and Chemical Engineering, Hubei University, Wuhan 430062, China

\* E-mail: [whhuang@whu.edu.cn](mailto:whhuang@whu.edu.cn)

\* E-mail: [zhangxh@hubu.edu.cn](mailto:zhangxh@hubu.edu.cn)

Supporting Information includes Figure S1-S7 and Table S1-S2.

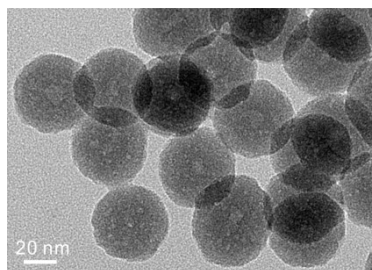

Figure S1. HRTEM images of Ru@SiO<sub>2</sub> nanoparticles without PEI.

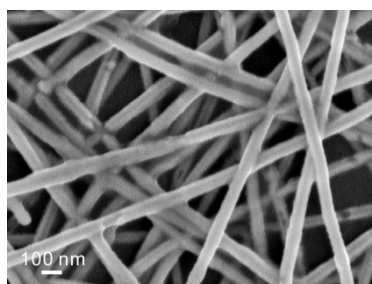

Figure S2. SEM image of bare Au NTs.

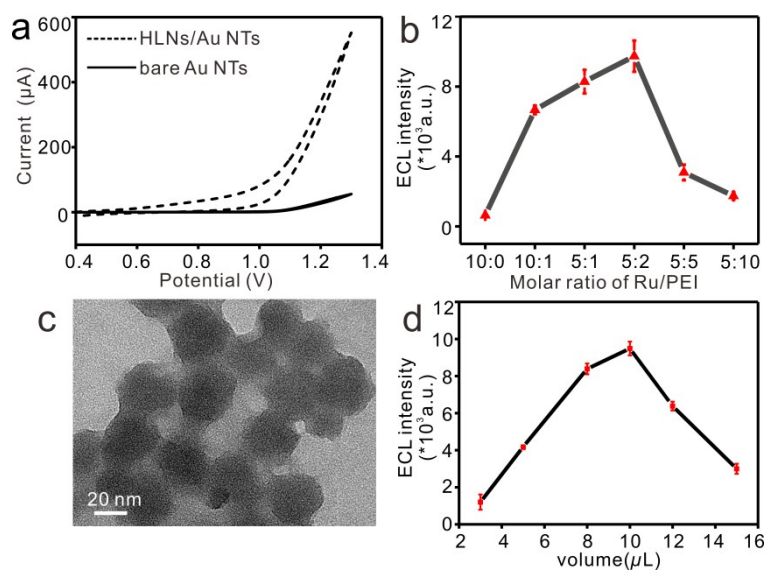

Figure S3. (a) Cyclic voltammograms of HLNs/Au NTs (dashed line) and bare Au NTs (solid line) in 0.1 M PBS (pH 7.4) at the scan range of 0.4 -1.3 V; (b) ECL response of HLNs/Au NTs/PDMS with different molar ratio of Ru(II) to PEI during the synthesized process of HLNs; (c) HRTEM images of HLNs with the molar ratio of 1:2 of Ru(II) to PEI; (d) Optimization of the dropped amount of HLNs on the ECL responses.

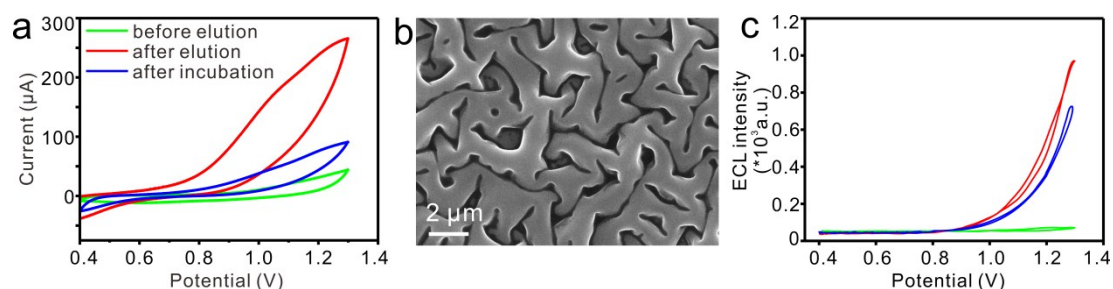

Figure S4. (a) Cyclic voltammograms obtained at MIP/HLNs/Au NTs in 600  $\mu\text{L}$  0.1 M PBS (pH 7.4) during elution and incubation process; (b) SEM image of surface appearance of NIP layer; (c) ECL signals in 0.1 M PBS (pH 7.4) for NIP/HLNs/Au NTs during before (green) and after elution (red), then rebinding (blue) process.

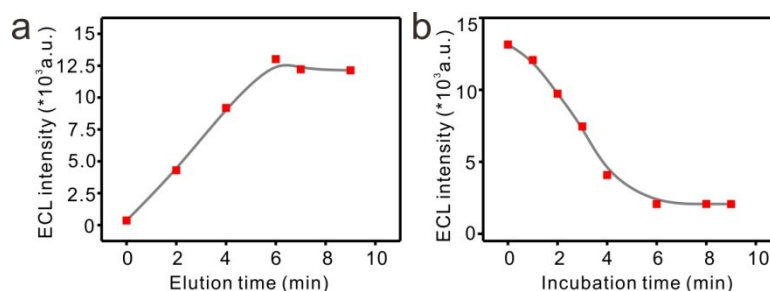

Figure S5. Optimization of (a) elution time and (b) rebinding time for the MIP-ECL sensor.

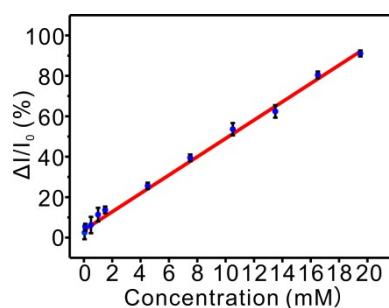

Figure S6. Calibration plot for increasing determination of urea over the 0.045, 0.09, 0.45, 1, 1.5, 4.5, 7.5, 10.5, 13.5, 16.5, 19.5 mM range with the flexible urea-imprinted HLNs/Au NTs sensor. Error bars represent standard deviations,  $n \geq 3$ . The regression equation is expressed as  $\Delta I/I_0 = 0.0443c + 0.0564$  where  $R^2$  is 0.9980.

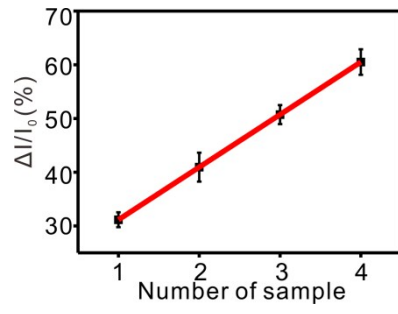

Figure S7. The ratio of ECL change value ( $\Delta I/I_0$ ) of flexible MIP-ECL platform in artificial sweat with extra lactate added from sample 1 to 4: 0 mM, 5 mM, 10 mM, 15 mM.

Table S1. Recovery determination of lactate in artificial sweat by flexible MIP-ECL sensor.

| Content of lactate in the sample | Added (mM) | Detected (mM) | Recovery (%) | RSD ( $n = 3$ ) (%) |
|----------------------------------|------------|---------------|--------------|---------------------|
| Artificial sweat<br>5.55 mM      | 2.50       | 8.01          | 98.4         | 2.1                 |
|                                  | 5.00       | 10.73         | 103.6        | 1.5                 |
|                                  | 7.50       | 13.01         | 99.5         | 2.1                 |

Table S2. Recovery determination of lactate in authentic sweat samples by flexible MIP-ECL sensor.

| Content of lactate in the sample         | Added (mM) | Detected (mM) | Recovery (%) | RSD ( $n = 3$ ) (%) |
|------------------------------------------|------------|---------------|--------------|---------------------|
| Authentic sweat<br>(number 4)<br>8.60 mM | 2.50       | 11.31         | 108.4        | 3.3                 |
|                                          | 5.00       | 13.22         | 92.4         | 2.5                 |
|                                          | 7.50       | 15.85         | 96.7         | 1.3                 |
